# Supplementary material
Source: PeerJ journal article supplement (doi:10.7717/peerj-cs.3765)
Supplement: FigureS1_staffEH.pdf [file FigureS1_staffEH.pdf]

**Traditional Fusion Algorithms**

**Probabilistic Methods**

**Statistical Methods**

**Knowledge-Based Methods**

**Evidence Reasoning Methods**

**Interval Analysis Methods**

**Bayesian Networks**

**State-Space Model**

**K-Nearest Neighbours**

**Least Square Estimation**

**Kalman Filter**

**Cross-Covariance**

**Covariance Intersection**

**Artificial Neural Networks**

**Fuzzy Logic**

**Genetic Algorithms**

**Particle Swarm**

**Ant Colony**

**Dempster-Shafer**

**Recursive Operators**

**Combination Rules**
